# Supplementary material
Source: HighWire-hosted journal article supplement (https://cmajopen.ca/highwire/filestream/87296/field_highwire_adjunct_files/1/open-2021-0023-original-submission.pdf)
Supplement: open-2021-0023-original-submission.pdf [file open-2021-0023-original-submission.pdf]

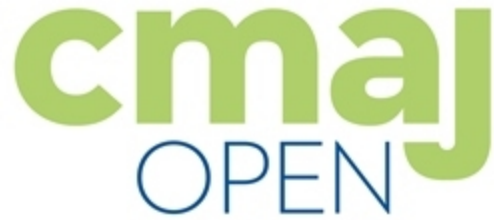

**NeuroCOVID-19: a longitudinal protocol for observing impact on brain structure and function in individuals recovering from COVID-19 after hospitalization or self-isolation**

|                               |                                                                                                                                                                                                                                                                                                                                                                                                                                                                                                                                                                                                                                                                                                                                                                                                                                                                                                                                                                                                                                              |
|-------------------------------|----------------------------------------------------------------------------------------------------------------------------------------------------------------------------------------------------------------------------------------------------------------------------------------------------------------------------------------------------------------------------------------------------------------------------------------------------------------------------------------------------------------------------------------------------------------------------------------------------------------------------------------------------------------------------------------------------------------------------------------------------------------------------------------------------------------------------------------------------------------------------------------------------------------------------------------------------------------------------------------------------------------------------------------------|
| Journal:                      | <i>CMAJ Open</i>                                                                                                                                                                                                                                                                                                                                                                                                                                                                                                                                                                                                                                                                                                                                                                                                                                                                                                                                                                                                                             |
| Manuscript ID                 | CMAJOpen-2021-0023                                                                                                                                                                                                                                                                                                                                                                                                                                                                                                                                                                                                                                                                                                                                                                                                                                                                                                                                                                                                                           |
| Manuscript Type:              | Protocol                                                                                                                                                                                                                                                                                                                                                                                                                                                                                                                                                                                                                                                                                                                                                                                                                                                                                                                                                                                                                                     |
| Date Submitted by the Author: | 28-Jan-2021                                                                                                                                                                                                                                                                                                                                                                                                                                                                                                                                                                                                                                                                                                                                                                                                                                                                                                                                                                                                                                  |
| Complete List of Authors:     | MacIntosh, Bradley; Sunnybrook Research Institute; University of Toronto, Medical Biophysics<br>Ji, Xiang; Sunnybrook Research Institute<br>Chen, J.; Rotman Research Institute<br>Gilboa, Asaf; Rotman Research Institute<br>Roudaia, Eugenie; Rotman Research Institute<br>Sekuler, Allison; Rotman Research Institute<br>Gao, Fuqiang; Sunnybrook Research Institute<br>Chad, Jordan; Rotman Research Institute<br>Jegatheesan, Aravinthan; Sunnybrook Research Institute<br>Masellis, Mario; Sunnybrook Health Sciences Centre, Medicine<br>Goubran, Maged; Sunnybrook Research Institute<br>Rabin, Jennifer; Sunnybrook Research Institute<br>Lam, Benjamin; Sunnybrook Health Sciences Centre, Medicine<br>Cheng, Ivy; Sunnybrook Health Sciences Centre, Medicine<br>Fowler, Robert; Sunnybrook Hospital, Medicine and Critical Care Medicine<br>Heyn, Chinthaka; Sunnybrook Health Sciences Centre, Medicine<br>Black, Sandra Elizabeth; Sunnybrook Health Sciences Centre, Medicine<br>Graham, Simon; Sunnybrook Research Institute |
| Keywords:                     | Neurology, Radiology and imaging, Infectious diseases, Behavioural sciences                                                                                                                                                                                                                                                                                                                                                                                                                                                                                                                                                                                                                                                                                                                                                                                                                                                                                                                                                                  |
| More Detailed Keywords:       | COVID-19, cognition, physiology                                                                                                                                                                                                                                                                                                                                                                                                                                                                                                                                                                                                                                                                                                                                                                                                                                                                                                                                                                                                              |
| Abstract:                     | Background: NeuroCOVID-19, a longitudinal observational study, was initiated in April 2020 to characterize the potential impact and lingering effects of coronavirus disease 2019 (COVID-19) on the human brain, among individuals who experience a broad range of COVID-19 illness. The protocol involves collecting imaging and behavioural data for parallel lines of investigation and integrated analyses.<br>Methods: NeuroCOVID-19 initially aims to recruit 180 adults into three groups: individuals who are no longer infectious after self-isolation or hospitalization due to COVID-19, and controls who are no longer                                                                                                                                                                                                                                                                                                                                                                                                           |

1  
2  
3  
4  
5  
6  
7  
8  
9  
10  
11  
12  
13  
14  
15  
16  
17  
18  
19  
20  
21  
22  
23  
24  
25  
26  
27  
28  
29  
30  
31  
32  
33  
34  
35  
36  
37  
38  
39  
40  
41  
42  
43  
44  
45  
46  
47  
48  
49  
50  
51  
52  
53  
54  
55  
56  
57  
58  
59  
60

|  |                                                                                                                                                                                                                                                                                                                                                                                                                                                                                                                                                                                                                                                                                                                                                                                                                                                                                                                                                                                                                                                                                                                                                                                                                                                                |
|--|----------------------------------------------------------------------------------------------------------------------------------------------------------------------------------------------------------------------------------------------------------------------------------------------------------------------------------------------------------------------------------------------------------------------------------------------------------------------------------------------------------------------------------------------------------------------------------------------------------------------------------------------------------------------------------------------------------------------------------------------------------------------------------------------------------------------------------------------------------------------------------------------------------------------------------------------------------------------------------------------------------------------------------------------------------------------------------------------------------------------------------------------------------------------------------------------------------------------------------------------------------------|
|  | <p>infectious after self-isolation due to flu-like symptoms and test negative for COVID-19. Initial and 3-month follow-up assessments include brain magnetic resonance imaging (MRI), behavioural assessment (sensation, cognition, mood and symptom self-report), and electroencephalography. Lung MRI is also included to study how brain changes relate to pulmonary changes. Informed by the other measures, the primary aim is to test for group differences in brain lesions assessed by high-resolution anatomical MRI. Regional cerebral blood flow, diffusion, resting state, and Gadolinium-contrast enhanced MRI data are also acquired.</p> <p>Results: Twenty-seven COVID-19 participants (25 self-isolated, 4 hospitalized) and 11 controls have completed initial assessment with approximately half receiving follow-up. Recruitment is on-going. Alterations in brain anatomy are evident in both the self-isolated and hospitalized COVID-19 groups, spanning young adult-hood to advanced age.</p> <p>Interpretation: The NeuroCOVID-19 protocol consists of anatomical, physiological, symptomological, and behavioural phenotyping for deep characterization of how COVID-19 may impact the brain, potentially with lingering effect.</p> |
|  |                                                                                                                                                                                                                                                                                                                                                                                                                                                                                                                                                                                                                                                                                                                                                                                                                                                                                                                                                                                                                                                                                                                                                                                                                                                                |

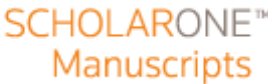

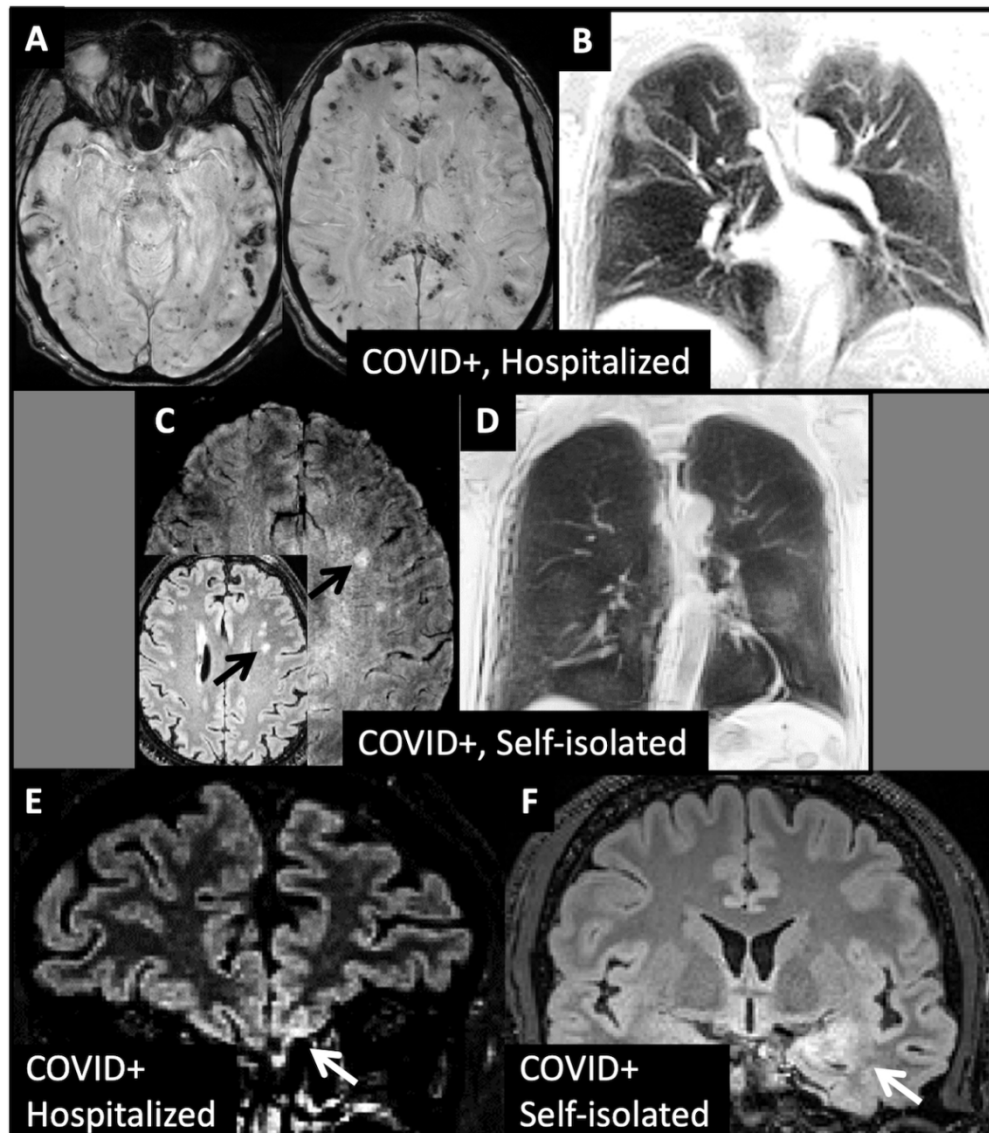

Figure 1. Brain and lung images from a selection of study participants. Top: a COVID+ male in his 50's who spent >12 days on a ventilator before recovering showed (A) numerous moderate sized lesions on SWI and (B) substantial abnormal signal intensities on lung imaging. This individual had severely impaired olfaction and moderate behavioural impairment (NIH toolbox 17th percentile on working memory, and complete inability to discriminate previously seen items from similar lures). He has been referred to a neurology clinic for follow-up. Middle: a COVID+ male in their 50's who self-isolated and showed micro-lesions in (C) SWI and T2 FLAIR imaging (inset), with (D) corresponding lung image with diffuse changes. Olfaction and sensory/behavioural tests were within age norms but self-report indicated difficulty in performing activities of daily living involving memory. Bottom: a COVID+ female in their 50's with moderately impaired olfaction and (E) elevated T2-FLAIR signal near the olfactory bulb and orbitofrontal cortex; and a COVID+ male in their 30's with an encephalitis-like lesion in the temporal lobe as observed (F) on T2-FLAIR imaging.

101x116mm (300 x 300 DPI)

**NeuroCOVID-19: a longitudinal protocol for observing impact on brain structure and function in individuals recovering from COVID-19 after hospitalization or self-isolation**

Bradley J. MacIntosh<sup>1,2,3,\*</sup>, Xiang Ji<sup>4,\*</sup>, J. Jean Chen<sup>5,3,\*</sup>, Asaf Gilboa<sup>5,\*</sup>, Eugenie Roudaia<sup>5,\*</sup>, Allison Sekuler<sup>5,\*</sup>, Fuqiang Gao<sup>3</sup>, Jordan A. Chad<sup>3,5</sup>, Aravinthan Jegatheesan<sup>2,3</sup>, Mario Masellis<sup>1,4,6</sup>, Maged Goubran<sup>1,2,3</sup>, Jennifer Rabin<sup>7,6,8</sup>, Benjamin Lam<sup>1,4,6</sup>, Ivy Cheng<sup>9,10</sup>, Robert Fowler<sup>11,10</sup>, Chris Heyn<sup>1,12</sup>, Sandra E. Black<sup>1,4,6</sup>, Simon J. Graham<sup>2,1,3</sup>

<sup>1</sup>Hurvitz Brain Science Program, Sunnybrook Research Institute, Toronto, Ontario, Canada

<sup>2</sup>Physical Sciences Platform, Sunnybrook Research Institute, Toronto, Ontario, Canada

<sup>3</sup>Department of Medical Biophysics, University of Toronto, Toronto, Ontario, Canada

<sup>4</sup>LC Campbell Cognitive Neurology Research Group, Sunnybrook Hospital, Toronto, Ontario, Canada

<sup>5</sup>Rotman Research Institute, Baycrest Health Sciences, Toronto, Ontario, Canada

<sup>6</sup>Division of Neurology, Department of Medicine, University of Toronto, Toronto, Ontario, Canada

<sup>7</sup>Harquail Centre for Neuromodulation, Sunnybrook Research Institute, Toronto, Ontario, Canada

<sup>8</sup>Rehabilitation Sciences Institute, University of Toronto, Toronto, Ontario, Canada

<sup>9</sup>Evaluative Sciences, Integrated Community Program, Sunnybrook Research Institute

<sup>10</sup>Department of Medicine, University of Toronto, Sunnybrook Health Sciences Centre, Toronto, Ontario, Canada

<sup>11</sup>Evaluative Sciences, Trauma, Emergency & Critical Care Research Program, Sunnybrook Research Institute

<sup>12</sup>Department of Medical Imaging, University of Toronto, Toronto, Ontario, Canada

\* denotes first author

**Corresponding author:** Bradley J MacIntosh, PhD, Senior Scientist, Sunnybrook Research Institute, [bmac@sri.utoronto.ca](mailto:bmac@sri.utoronto.ca)

**Grant Support:** This study is funded in part by the Sunnybrook Foundation and the Sandra Black Centre for Brain Resilience and Recovery.

## Abstract

**Background:** NeuroCOVID-19, a longitudinal observational study, was initiated in April 2020 to characterize the potential impact and lingering effects of coronavirus disease 2019 (COVID-19) on the human brain, among individuals who experience a broad range of COVID-19 illness. The protocol involves collecting imaging and behavioural data for parallel lines of investigation and integrated analyses.

**Methods:** NeuroCOVID-19 initially aims to recruit 180 adults into three groups: individuals who are no longer infectious after self-isolation or hospitalization due to COVID-19, and controls who are no longer infectious after self-isolation due to flu-like symptoms and test negative for COVID-19. Initial and 3-month follow-up assessments include brain magnetic resonance imaging (MRI), behavioural assessment (sensation, cognition, mood and symptom self-report), and electroencephalography. Lung MRI is also included to study how brain changes relate to pulmonary changes. Informed by the other measures, the primary aim is to test for group differences in brain lesions assessed by high-resolution anatomical MRI. Regional cerebral blood flow, diffusion, resting state, and gadolinium-contrast enhanced MRI data are also acquired.

**Results:** Twenty-seven COVID-19 participants (25 self-isolated, 4 hospitalized) and 11 controls have completed initial assessment with approximately 50% completing follow-up. Recruitment is on-going. Alterations in brain anatomy are evident in both the self-isolated and hospitalized COVID-19 groups, spanning young adult-hood to advanced age.

**Interpretation:** The NeuroCOVID-19 protocol consists of anatomical, physiological, symptomological, and behavioural phenotyping for deep characterization of how COVID-19 may impact the brain, potentially with lingering effect.

## Introduction

The severe acute respiratory syndrome coronavirus 2 (SARS-CoV-2) and its related illness coronavirus disease 2019 (COVID-19) can impact not only the lungs, but other organs including the brain. Focusing on acute presentations of hospitalized patients, recent reviews have discussed neuroinflammatory and vascular mechanisms of brain injury due to COVID-19 (1,2), whereas other research suggests that COVID-19 especially increases risk of large vessel stroke and multi-territory infarcts (3,4). Ischemic stroke may be due to SARS-CoV-2 depleting bioavailability of the angiotensin-converting enzyme-2 (ACE2) receptor, whereas hemorrhagic stroke points to vulnerability of the endothelial cells to the coronavirus (5,6).

Little is known about mid- and long-term neurocognitive outcomes across the spectrum of COVID-19 illnesses, despite the recognition that acute symptoms may persist after hospital discharge (7,8) and that “long-haul” symptoms include a neurological component (9). Moreover, neurological effects of COVID-19 are likely under-reported at present in the scientific literature, which focuses primarily on hospitalized patients - not the much larger number of individuals who were triaged or otherwise self-isolated, some with concerning symptoms. To address these issues, we have thus developed a novel experimental protocol (NeuroCOVID-19) to characterize the broad-ranging brain changes due to COVID-19, and their time-course. The protocol includes: a) high-resolution anatomical magnetic resonance imaging (MRI) to visualize gross neuropathology as well as subtle effects in individuals, such as small vessel disease, narrowing of the olfactory cleft, or potential impact on the olfactory bulb or medulla oblongata from coronavirus invasion of the olfactory or trigeminal nerves (10); b) MRI of physiological function to assess impact (at the group level) on cerebral hemodynamics, blood brain barrier (BBB) permeability, neuroinflammation, white matter microstructure, and resting state connectivity (11); c) state-of-the-art breath-hold lung MRI to assess neural-respiratory relationships; and d) characterization of deficits in smell, vision, domain-specific cognitive impairment, mood, and electroencephalography (EEG) measures, as appropriate to document longitudinal brain/behavioural characteristics and symptoms. The primary hypothesis is that at initial assessment (when no longer

1  
2  
3 infectious), individuals with COVID-19 have increased brain lesion burden relative to a control group of  
4 individuals who had flu-like symptoms but tested negative for COVID-19. Second, COVID-19 is  
5 hypothesized to yield neurophysiological, olfactory, and behavioural alterations detected at initial and 3-  
6 month follow-up assessments. Exploratory analyses are also planned to identify potential at-risk profiles  
7 among COVID-19 individuals by investigating associations between brain measures, lung measures,  
8 symptoms and their duration, cognitive and behavioural deficits, and EEG measures.  
9  
10  
11  
12  
13  
14  
15  
16  
17  
18  
19

## 20 **Methods:**

### 21 *Study design*

22  
23  
24 NeuroCOVID-19 is a longitudinal observational study that is recruiting non-infectious participants in  
25 three cohorts: individuals who contracted COVID-19 and were either 1) hospitalized, or 2) self-isolated;  
26 and age- and sex-matched controls, 3) with recent flu-like symptoms who tested negative for COVID-19  
27 and were self-isolated. The target sample size for each cohort is 60 (30 males, 30 females). Brain  
28 imaging, sensory, self-report, and cognitive assessments are administered at initial and 3-month follow-up  
29 hospital visits, interleaved between 3 virtual visits (Table 1).  
30  
31  
32  
33  
34  
35  
36  
37  
38

### 39 *Setting*

40  
41 The protocol and informed consent form were approved by the Research Ethics Board and Infection and  
42 Prevention Control at Sunnybrook Health Sciences Centre on April 4, 2020. Recruitment is ongoing.  
43  
44 Participants provide free and informed consent prior to study initiation, and all in-hospital assessments are  
45 administered while research staff and participants wear personal protective equipment.  
46  
47  
48  
49  
50

### 51 *Participants*

52  
53 Participants are eligible for inclusion if they are from 19-75 years old, have documented proof of their  
54 COVID-19 test result and reside in the community. Exclusion criteria include previous dementia,  
55  
56  
57  
58  
59  
60

1  
2  
3 neurological disorder, severe psychiatric illness, traumatic brain injury, on-going unstable cardiovascular  
4 disease, and contraindications to MRI (e.g., ferromagnetic implants). Contrast-enhanced MRI (see below)  
5 is not performed in individuals with poor kidney function (est. glomerular filtration rate < 60  
6 mL/min/1.73 m<sup>2</sup>), or at follow-up. Recruitment is undertaken through the emergency department  
7 electronic database, physician referrals, and advertisements in the community and on social media.  
8  
9  
10  
11  
12  
13  
14  
15

### 16 ***Data sources***

17  
18 *COVID-19 status.* Diagnosis is determined by a provincial-approved facility through a nasopharyngeal or  
19 oropharyngeal swab and subsequent real-time reverse transcription polymerase chain reaction (RT-PCR)  
20 test, according to Public Health Ontario procedures (12).  
21  
22  
23  
24  
25

26 *3 Tesla MRI.* The MRI protocol (Table 2) includes high-resolution anatomical imaging (T1-weighted, T2-  
27 weighted, fluid-attenuated inversion recovery, and susceptibility weighted imaging) to identify brain  
28 lesions and permit tissue density and volumetric analysis. Pseudo-continuous arterial spin labeling  
29 (pCASL) MRI is performed using a single post-labeling delay to quantify cerebral blood flow (CBF).  
30 Resting state functional MRI (rs-fMRI) is performed to evaluate regional brain connectivity. Triple-shell  
31 diffusion weighted imaging (DWI) is performed to probe microstructural integrity of the white and grey  
32 matter using multiple metrics. Lung MRI is performed with an ultra-short echo time rapid breath-hold  
33 acquisition. Dynamic Susceptibility Contrast (DSC) MRI is performed using a common MRI contrast  
34 agent (Gadovist, Bayer; injected at a dose of 1 ml/kg with 25cc saline flush at a rate of 5cc/sec) to  
35 evaluate cerebral hemodynamics. Ten minutes post-injection, T1-weighted MRI is repeated to visualize  
36 potential BBB leakage.  
37  
38  
39  
40  
41  
42  
43  
44  
45  
46  
47  
48  
49  
50

51 After a short break, including water and/or snack, participants complete the following tests in a  
52 soundproof assessment room.  
53  
54  
55  
56  
57  
58  
59  
60



1  
2  
3 *Smell.* The 40-odorant University of Pennsylvania Smell Identification Test (UPSIT, Sonsonics  
4 International) characterizes olfactory function relative to normed data, yielding results ranging from  
5 normosmia to severe/total anosmia. The UPSIT is well established for assessing olfactory dysfunction  
6 from COVID-19 (13).  
7  
8  
9  
10

11  
12  
13 *Vision:* As COVID19 may have possible impacts on the eye (14) or neural visual perceptual functions, the  
14 Freiburg Vision Test (FrACT) (15) is used to measure far visual acuity and vernier acuity, and binocular  
15 contrast sensitivity is measured using the Pelli-Robson Contrast Sensitivity Test.  
16  
17  
18  
19  
20

21  
22  
23 *Cognition.* The NIH Toolbox full Cognition Battery is administered using an iPad app (16), covering  
24 perceptual, attention, executive, language, and memory domains. A Mnemonic Similarity Task test is also  
25 included to supplement memory assessment, sensitive to age-related memory decline, as well as  
26 hippocampal function and connectivity (17).  
27  
28  
29  
30  
31

32  
33  
34 *Mood & Functional Outcome:* Emotional status is assessed using the full NIH Emotion toolbox  
35 administered remotely. Subjective cognitive, sleep, fatigue, dyspnea and general functional status are  
36 collected using the PROMIS tools (18).  
37  
38  
39  
40  
41

42 *Electroencephalography (EEG):* A four-channel wireless EEG headband (Muse, InteraXon, Toronto, CA,  
43 RRID:SCR\_014418) is used to record EEG at rest with eyes closed (5 min) and eyes open (10 min) (19),  
44 during an auditory oddball task in which participants respond to infrequent target tones and ignore  
45 frequent standard tones, and during a visual perceptual task that requires discriminating a contour in a  
46 cluttered background of increasing density (20). Spectral EEG power and event-related potentials will be  
47 used to probe possible changes in neural function (21), brainstem dysfunction associated with cognitive  
48 impairment, and delays in visual perceptual processes.  
49  
50  
51  
52  
53  
54  
55  
56  
57  
58  
59  
60

1  
2  
3  
4  
5  
6  
7  
8  
9  
10  
11 *Electroencephalography (EEG):* A four-channel wireless EEG headband (Muse, InteraXon, Toronto, CA)  
12  
13 is used to record EEG at rest with eyes closed (5 min) and eyes open (10 min) to assess possible  
14  
15 disruptions in mental processing (21); as well as during an oddball task (P300) in which participants  
16  
17 respond to infrequent target tones and ignore frequent standard tones, and a clutter test that requires  
18  
19 discriminating a contour in a cluttered background of increasing density. These tasks probe possible  
20  
21 brainstem dysfunction associated with cognitive impairment (19,20).  
22  
23  
24  
25

### 26 ***Primary outcome***

27  
28 Lesion volume burden is the primary outcome and is based on the aggregate of white matter  
29  
30 hyperintensities (WMH), microbleeds, infarcts and areas of inflammation, which are hypothesized to  
31  
32 occur more frequently in COVID-19 survivors than controls. Importantly, MRI-visible vascular lesions  
33  
34 are related to aging and vascular risk factors, and over their lifetimes. In addition, COVID-19 negative  
35  
36 control participants may have had exposure to other potential pathogens (e.g. bacterial or viral) that are  
37  
38 capable of CNS invasion (22). A linear regression model will be used to test for an association between  
39  
40 brain lesions and COVID-19 while accounting for age and sex as covariates. Days spent in the intensive  
41  
42 care unit and the cardiovascular disease Framingham Risk Score (23) will be added to the model in  
43  
44 separate sensitivity analyses. A preliminary power analysis using G\*Power software estimates that for  
45  
46 N=180 cross-sectional samples, alpha=0.01, and power=0.80, an effect size of 0.28 is required to show a  
47  
48 significant parameter estimate that relates a normally distributed measure of brain lesion volume with the  
49  
50 COVID-19 group (critical F=4.73, df1=2,df2=175).  
51  
52  
53  
54  
55

### 56 ***Data Analysis***

1  
2  
3 Anatomical brain and lung MRI data will be scored by research neuroradiologists. The high spatial  
4 resolution brain images (1 mm isotropic voxels) will also permit detailed quantification of brain lesion  
5 burden using semi-automatic Sunnybrook software (24), as required for primary analysis. The lung  
6 images will be scored by adapting a scale used to assess lung computed tomography (CT) findings in  
7 COVID-19 patients (25). Additional secondary analyses will be conducted using established  
8 neuroimaging freeware packages for pre-processing and calculating output parameters. For example,  
9 DWI data will be analyzed to account for free water using a two-compartment model (26) using DIPY  
10 (27). DSC images will be processed to estimate CBF, cerebral blood volume (CBV), mean transit time,  
11 and contrast leakage maps using 3D Slicer software (28). Standard analyses for neurophysiological,  
12 sensory, and cognitive data will also be performed (e.g. according to NIH toolbox procedures). Univariate  
13 model testing will be conducted to assess whether the effects of COVID-19 on individual outcome  
14 variables persist from initial testing to 3-months follow-up, relative to controls. Finally, linear mixed  
15 effects models, and data-driven multivariate analyses such as partial least squares, will be used to relate  
16 MRI findings with clinical, olfactory, behavioural, and electrophysiological outputs.  
17  
18  
19  
20  
21  
22  
23  
24  
25  
26  
27  
28  
29  
30  
31  
32  
33  
34

## 35 **Results**

36  
37 To date, 44 participants (32 COVID-19 patients, 5 hospitalized; and 12 controls) have had initial  
38 assessment and approximately half of each group have had follow-up. Common symptoms across the  
39 whole sample were: fatigue, fever, cough, and sore throat. Preliminary MRI results are shown in Fig. 1.  
40  
41  
42  
43  
44

## 45 **Interpretation**

46  
47 The NeuroCOVID-19 observational study investigates neurological and lung effects associated with  
48 COVID-19 in patients who were either hospitalized or self-isolated while infectious, compared to a novel  
49 matched control group of COVID-19 negative individuals who experienced cold or flu-like symptoms.  
50  
51  
52  
53  
54 Longitudinal follow-up at 3 months is used to assess whether effects linger or resolve.  
55  
56  
57  
58  
59  
60

1  
2  
3 *Knowledge Gap.* There are numerous neuroimaging reports of hospitalized COVID-19 patients with  
4 vascular and inflammatory lesions. However, much less is known about whether neuroimaging,  
5 behavioral, and electrophysiological alterations occur among COVID-19 individuals who were not  
6 hospitalized and self-isolated while infectious. Triaging COVID-19 patients has been an essential part of  
7 pandemic plans, however “hospitalized versus self-isolated” may be a false dichotomy in terms of the  
8 brain. COVID-19 may impact the brain in the absence of respiratory symptoms (29), and cerebrovascular  
9 lesions and/or microstructural alterations can occur insidiously, both with and without overt behavioural  
10 symptoms. Hence there is a strong possibility that COVID-19-related brain burden is underestimated in  
11 the general population. NeuroCOVID-19 addresses this knowledge gap. The initial anatomical MRI data  
12 suggest that COVID-19 participants can show brain impact from their disease over a broad age range,  
13 including young and middle-aged adults. The effects are not limited to hospitalized individuals and  
14 include those that were self-isolating with limited healthcare while infectious.  
15  
16  
17  
18  
19  
20  
21  
22  
23  
24  
25  
26  
27  
28  
29

30 *Limitations.* First, diagnostic certainty of COVID-19 status is limited by the sensitivity and specificity of  
31 the PCR tests. Blood biomarkers of immunity status and other factors would provide important  
32 complementary information, and can be added to the protocol in the future. Second, recruitment bias can  
33 not be ruled out. Third, additional control groups are of interest: controls that have not experienced flu-  
34 like illness, to more broadly assess the impact of the pandemic on brain measures (30); and ICU patients  
35 that have not contracted COVID-19 but have been on a ventilator for an extended period, to address  
36 whether brain pathology and dysfunctions are unique to severe COVID-19 illness (31).  
37  
38  
39  
40  
41  
42  
43  
44  
45  
46

47 *Conclusion.* A growing body of literature supports notions of neuroinvasion and/or deleterious brain  
48 changes resulting from COVID-19 in some individuals. The extent of these changes and their time  
49 courses remain to be determined across the general population - not just in hospitalized individuals. The  
50 NeuroCOVID-19 protocol is designed to address this issue and to foster scientific collaboration and/or  
51 adoption at other sites to increase the scope of the study findings, using innovative methodology. For  
52  
53  
54  
55  
56  
57  
58  
59  
60

1  
2  
3 example, the MRI protocol includes anatomical spatial resolution that exceeds typical imaging, such that  
4  
5 smaller-sized lesions can be detected. Lung MRI provides an innovative alternative to chest CT or x-ray  
6  
7 while avoiding radiation dose. The extensive functional imaging is designed to increase sensitivity to  
8  
9 altered brain physiology. Lastly, aspects of the sensory, behavioural and EEG tests are conducive to  
10  
11 mobile or remote assessment.  
12  
13  
14

### 15 **Acknowledgement**

16  
17 We gratefully acknowledge MRI technologists Garry Detzler and Ruby Endre, as well as contributions  
18  
19 from Ellen Cohen, Masud Hussain, and Baycrest's KL-CARE staff Haddas Grosbein and Devin Sodums.  
20  
21  
22  
23  
24  
25  
26  
27  
28  
29  
30  
31  
32  
33  
34  
35  
36  
37  
38  
39  
40  
41  
42  
43  
44  
45  
46  
47  
48  
49  
50  
51  
52  
53  
54  
55  
56  
57  
58  
59  
60

Confidential

## References

1. Herman C, Mayer K, Sarwal A. Scoping review of prevalence of neurologic comorbidities in patients hospitalized for COVID-19. *Neurology*. 2020 14;95(2):77–84.
2. Baig AM, Khaleeq A, Ali U, Syeda H. Evidence of the COVID-19 Virus Targeting the CNS: Tissue Distribution, Host-Virus Interaction, and Proposed Neurotropic Mechanisms. *ACS Chem Neurosci*. 2020 01;11(7):995–8.
3. Nannoni S, de Groot R, Bell S, Markus HS. Stroke in COVID-19: A systematic review and meta-analysis. *Int J Stroke Off J Int Stroke Soc*. 2020 Nov 11;1747493020972922.
4. Merkler AE, Parikh NS, Mir S, Gupta A, Kamel H, Lin E, et al. Risk of Ischemic Stroke in Patients With Coronavirus Disease 2019 (COVID-19) vs Patients With Influenza. *JAMA Neurol*. 2020 Jul 2;
5. Hess DC, Eldahshan W, Rutkowski E. COVID-19-Related Stroke. *Transl Stroke Res*. 2020;11(3):322–5.
6. Ellul MA, Benjamin L, Singh B, Lant S, Michael BD, Easton A, et al. Neurological associations of COVID-19. *Lancet Neurol*. 2020;19(9):767–83.
7. Halpin SJ, Mclvor C, Whyatt G, Adams A, Harvey O, McLean L, et al. Postdischarge symptoms and rehabilitation needs in survivors of COVID-19 infection: A cross-sectional evaluation. *J Med Virol*. 2020 Aug 17;jmv.26368.
8. Carfi A, Bernabei R, Landi F, for the Gemelli Against COVID-19 Post-Acute Care Study Group. Persistent Symptoms in Patients After Acute COVID-19. *JAMA*. 2020 Aug 11;324(6):603.
9. Couzin-Frankel J. The long haul. *Science*. 2020 Aug 7;369(6504):614–7.
10. Netland J, Meyerholz DK, Moore S, Cassell M, Perlman S. Severe acute respiratory syndrome coronavirus infection causes neuronal death in the absence of encephalitis in mice transgenic for human ACE2. *J Virol*. 2008 Aug;82(15):7264–75.
11. Steardo L, Steardo L, Zorec R, Verkhatsky A. Neuroinfection may contribute to pathophysiology and clinical manifestations of COVID-19. *Acta Physiol Oxf Engl*. 2020;229(3):e13473.
12. Coronavirus Disease 2019 (COVID-19) – PCR [Internet]. Public Health Ontario. [cited 2021 Jan 19]. Available from: [https://www.publichealthontario.ca/en/Laboratory\\_Services/Test\\_Information\\_Index/Covid\\_19](https://www.publichealthontario.ca/en/Laboratory_Services/Test_Information_Index/Covid_19)
13. Moein ST, Hashemian SM, Mansourafshar B, Khorram-Tousi A, Tabarsi P, Doty RL. Smell dysfunction: a biomarker for COVID-19. *Int Forum Allergy Rhinol*. 2020;10(8):944–50.
14. Lee YH, Kim YC, Shin JP. Characteristics of Ocular Manifestations of Patients with Coronavirus Disease 2019 in Daegu Province, Korea. *J Korean Med Sci*. 2020 Sep 7;35(35):e322.
15. Bach M. The Freiburg Visual Acuity test--automatic measurement of visual acuity. *Optom Vis Sci Off Publ Am Acad Optom*. 1996 Jan;73(1):49–53.
16. Weintraub S, Dikmen SS, Heaton RK, Tulsky DS, Zelazo PD, Bauer PJ, et al. Cognition assessment using the NIH Toolbox. *Neurology*. 2013 Mar 12;80(11 Suppl 3):S54-64.
17. Stark SM, Kirwan CB, Stark CEL. Mnemonic Similarity Task: A Tool for Assessing Hippocampal Integrity. *Trends Cogn Sci*. 2019 Nov;23(11):938–51.
18. Quatrano LA, Cruz TH. Future of Outcomes Measurement: Impact on Research in Medical Rehabilitation and Neurologic Populations. *Arch Phys Med Rehabil*. 2011 Oct;92(10):S7–11.
19. Hashemi A, Pino LJ, Moffat G, Mathewson KJ, Aimone C, Bennett PJ, et al. Characterizing Population EEG Dynamics throughout Adulthood. *eneuro*. 2016 Nov;3(6):ENEURO.0275-16.2016.
20. Roudaia E, Bennett PJ, Sekuler AB. Contour integration and aging: the effects of element spacing, orientation alignment and stimulus duration. *Front Psychol*. 2013;4:356.
21. Antony AR, Haneef Z. Systematic review of EEG findings in 617 patients diagnosed with COVID-19. *Seizure*. 2020 Dec;83:234–41.
22. Dando SJ, Mackay-Sim A, Norton R, Currie BJ, St John JA, Ekberg JAK, et al. Pathogens penetrating

- 1  
2  
3 the central nervous system: infection pathways and the cellular and molecular mechanisms of  
4 invasion. *Clin Microbiol Rev.* 2014 Oct;27(4):691–726.
- 5  
6 23. D’Agostino RB, Vasan RS, Pencina MJ, Wolf PA, Cobain M, Massaro JM, et al. General cardiovascular  
7 risk profile for use in primary care: the Framingham Heart Study. *Circulation.* 2008 Feb  
8 12;117(6):743–53.
- 9  
10 24. Ramirez J, Gibson E, Quddus A, Lobaugh NJ, Feinstein A, Levine B, et al. Lesion Explorer: a  
11 comprehensive segmentation and parcellation package to obtain regional volumetrics for  
12 subcortical hyperintensities and intracranial tissue. *NeuroImage.* 2011 Jan 15;54(2):963–73.
- 13  
14 25. Zhou Z, Guo D, Li C, Fang Z, Chen L, Yang R, et al. Coronavirus disease 2019: initial chest CT findings.  
15 *Eur Radiol.* 2020 Aug;30(8):4398–406.
- 16  
17 26. Hoy AR, Koay CG, Kecskemeti SR, Alexander AL. Optimization of a free water elimination two-  
18 compartment model for diffusion tensor imaging. *NeuroImage.* 2014 Dec;103:323–33.
- 19  
20 27. Garyfallidis E, Brett M, Amirbekian B, Rokem A, van der Walt S, Descoteaux M, et al. Dipy, a library  
21 for the analysis of diffusion MRI data. *Front Neuroinformatics [Internet].* 2014 Feb 21 [cited 2021  
22 Jan 20];8. Available from: <http://journal.frontiersin.org/article/10.3389/fninf.2014.00008/abstract>
- 23  
24 28. Fedorov A, Beichel R, Kalpathy-Cramer J, Finet J, Fillion-Robin J-C, Pujol S, et al. 3D Slicer as an image  
25 computing platform for the Quantitative Imaging Network. *Magn Reson Imaging.* 2012  
26 Nov;30(9):1323–41.
- 27  
28 29. Fridman S, Bres Bullrich M, Jimenez-Ruiz A, Costantini P, Shah P, Just C, et al. Stroke risk,  
29 phenotypes, and death in COVID-19: Systematic review and newly reported cases. *Neurology.* 2020  
30 Dec 15;95(24):e3373–85.
- 31  
32 30. Nwachukwu I, Nkire N, Shalaby R, Hrabok M, Vuong W, Gusnowski A, et al. COVID-19 Pandemic:  
33 Age-Related Differences in Measures of Stress, Anxiety and Depression in Canada. *Int J Environ Res*  
34 *Public Health.* 2020 Sep 1;17(17):6366.
- 35  
36 31. Müller A, von Hofen-Hohloch J, Mende M, Saur D, Fricke C, Bercker S, et al. Long-term cognitive  
37 impairment after ICU treatment: a prospective longitudinal cohort study (Cog-I-CU). *Sci Rep.* 2020  
38 Dec;10(1):15518.
- 39  
40 32. Alsop DC, Detre JA, Golay X, Günther M, Hendrikse J, Hernandez-Garcia L, et al. Recommended  
41 implementation of arterial spin-labeled perfusion MRI for clinical applications: A consensus of the  
42 ISMRM perfusion study group and the European consortium for ASL in dementia. *Magn Reson Med.*  
43 2015 Jan;73(1):102–16.
- 44  
45 33. Chassagnon G, Martin C, Ben Hassen W, Freche G, Bennani S, Morel B, et al. High-resolution lung  
46 MRI with Ultrashort-TE: 1.5 or 3 Tesla? *Magn Reson Imaging.* 2019 Sep;61:97–103.
- 47  
48  
49  
50  
51  
52  
53  
54  
55  
56  
57  
58  
59  
60

1  
2  
3 **Summary of Tables and Figures, with text captions**  
4  
5  
6  
7  
8  
9  
10  
11

12  
13  
14  
15  
16  
17  
18  
19  
20  
21  
22  
23  
24  
25  
26  
27  
28  
29  
30  
31  
32  
33

| Visit                                       | Protocol / Assessment                                           | Added description                                                                                                                                                                             |
|---------------------------------------------|-----------------------------------------------------------------|-----------------------------------------------------------------------------------------------------------------------------------------------------------------------------------------------|
| 1 (virtual, by phone)                       | Eligibility, consenting, COVID-19 test documentation            | Review inclusion/exclusion criteria and MRI contraindication, collect demographics, medical symptoms & history, and screen for compliance and illness status (24 hours prior to study visit). |
| 2 (in hospital)                             | Brain and lung MRI, smell, vision, NIH toolbox assessments, EEG |                                                                                                                                                                                               |
| 3 (virtual, by internet)                    | Mnemonic similarity task, PROMIS assessments                    | Complete initial assessments using online meeting platforms.                                                                                                                                  |
| 4 (in hospital; 3 month follow-up)          | repeat visit 1                                                  | Contrast agent not injected at follow-up.                                                                                                                                                     |
| 5 (virtual, by internet; 3 month follow-up) | repeat visit 2                                                  |                                                                                                                                                                                               |

34 **Table 1.** Summary of visit assessments for the NeuroCOVID-19 study. Abbreviations are: COVID-19= coronavirus disease; MRI=magnetic resonance imaging; NIH toolbox=National Institute of Health toolbox for neurocognitive testing. EEG= electroencephalography. PROMIS= patient-reported outcomes measurement information system.  
35  
36  
37  
38  
39  
40  
41  
42  
43  
44  
45  
46  
47  
48  
49  
50  
51  
52  
53  
54  
55  
56  
57  
58  
59  
60



| MRI Sequence                                                                                                                | Parameters                                                                                                                                                                                                                                           | Scan Time (min:sec) |
|-----------------------------------------------------------------------------------------------------------------------------|------------------------------------------------------------------------------------------------------------------------------------------------------------------------------------------------------------------------------------------------------|---------------------|
| <b>3D MPRAGE (Magnetization Prepared RApid Gradient Echo)</b>                                                               | TR/TE/TI=2500/4.7/1100 ms; $\theta=7^\circ$ ; FOV=256×256×192 mm; 1 mm isotropic voxels                                                                                                                                                              | 3:45                |
| <b>3D T2-weighted FLAIR (FLuid-Attenuated Inversion Recovery)</b>                                                           | TR/TE/TI=5000/388/1800 ms; FOV=256×256×192 mm; 1 mm isotropic voxels                                                                                                                                                                                 | 5:57                |
| <b>3D T2-weighted SPACE (Sampling Perfection with Application-optimized Contrasts using different flip angle Evolution)</b> | TR/TE <sub>eff</sub> =3200/408 ms<br>FOV=240×240×176 mm<br>0.9 mm isotropic voxels                                                                                                                                                                   | 3:42                |
| <b>2D SWI (Susceptibility-Weighted Imaging)</b>                                                                             | TR/TE=28/20 ms; FOV=240×240×156 mm<br>Acceleration factor=2; 23.1% oversampling<br>0.625×0.625×3.0 mm voxels                                                                                                                                         | 4:02                |
| <b>2D Triple-shell DTI (Diffusion Weighted Imaging)</b>                                                                     | TR/TE=4300/62 ms; FOV=240×240 mm; 60 slices<br>2.5 mm isotropic voxels; b=700,1400,2100 s/mm <sup>2</sup><br>30 gradient directions; 4 b=0 values; 1 average                                                                                         | 8:34                |
| <b>3D pCASL (Pseudo-Continuous Arterial Spin Labelling)</b>                                                                 | label duration=1500 ms ; post-label delay=1800 ms<br>3D echo planar turbo gradient spin echo readout<br>TR/TE <sub>eff</sub> =4100/37 ms; FOV=240×240×120 mm<br>2.5 mm isotropic voxels; 10% oversampling<br>Turbo factor=14; background suppression | 4:27                |
| <b>2D BOLD (Blood Oxygenation Level-Dependent) resting state functional MRI</b>                                             | 2D echo planar imaging; TR/TE=2130/30 ms; flip angle=70°<br>FOV=224×224×140 mm; 3.5 mm isotropic voxels<br>250 time points                                                                                                                           | 9:00                |
| <b>UTE-VIBE (Ultra-short TE with Volumetric Interpolated Breath-hold Examination)</b>                                       | TR/TE=2.5/0.05 ms; $\theta=5.5^\circ$ ; coronal prescription<br>600×600×260 mm; 2.1×2.1×2.5 mm voxels                                                                                                                                                | 0:14                |
| <b>Contrast Agent Administration</b>                                                                                        |                                                                                                                                                                                                                                                      |                     |
| <b>DSC (Dynamic Susceptibility Contrast) MRI</b>                                                                            | 2D echo planar imaging; TR/TE=1250/30 ms<br>$\theta=7^\circ$ ; FOV=220×220×80 mm<br>1.74×1.74×4.0 mm voxels; 140 time points                                                                                                                         | 3:07                |
| <b>UTE-VIBE (Ultra-short TE with Volumetric Interpolated Breath-hold Examination)</b>                                       | TR/TE=2.5/0.05 ms; $\theta=5.5^\circ$ ; coronal prescription<br>600×600×260 mm; 2.1×2.1×2.5 mm voxels                                                                                                                                                | 0:14                |
| <b>3D MPRAGE (Magnetization Prepared RApid Gradient Echo), 10 min post-injection.</b>                                       | TR/TE/TI=2500/4.7/1100 ms; $\theta=7^\circ$ ; FOV=256×256×192 mm; 1 mm isotropic voxels                                                                                                                                                              | 3:45                |
| <b>Total Session Time</b>                                                                                                   |                                                                                                                                                                                                                                                      | <b>56:33</b>        |

**Table 2.** MRI sequences, key acquisition parameters, sequence timing and protocol timing for the NeuroCOVID-19 study, undertaken at Sunnybrook Research Institute using a Magnetom Prisma 3T MRI system (Siemens Healthineers, Erlangen, DEU). 3D=three dimensional; 2D=two dimensional multislice; TR=repetition time; TE=echo time; TE<sub>eff</sub>=effective echo time; TI=inversion time;  $\theta$ =flip angle; FOV=field of view. All sequences are part of the Siemens MRI product, with the exception of the pCASL implementation (32) and the lung MRI implementation (33). Lung MRI is performed immediately prior to intravenous administration of the contrast agent and immediately following the DSC MRI. 3D T1-weighted MPRAGE MRI is repeated following DSC MRI, 10 minutes after administration of contrast agent. Brain and lung MRI are conducted with the standard head coil and standard 18-channel body array, respectively.

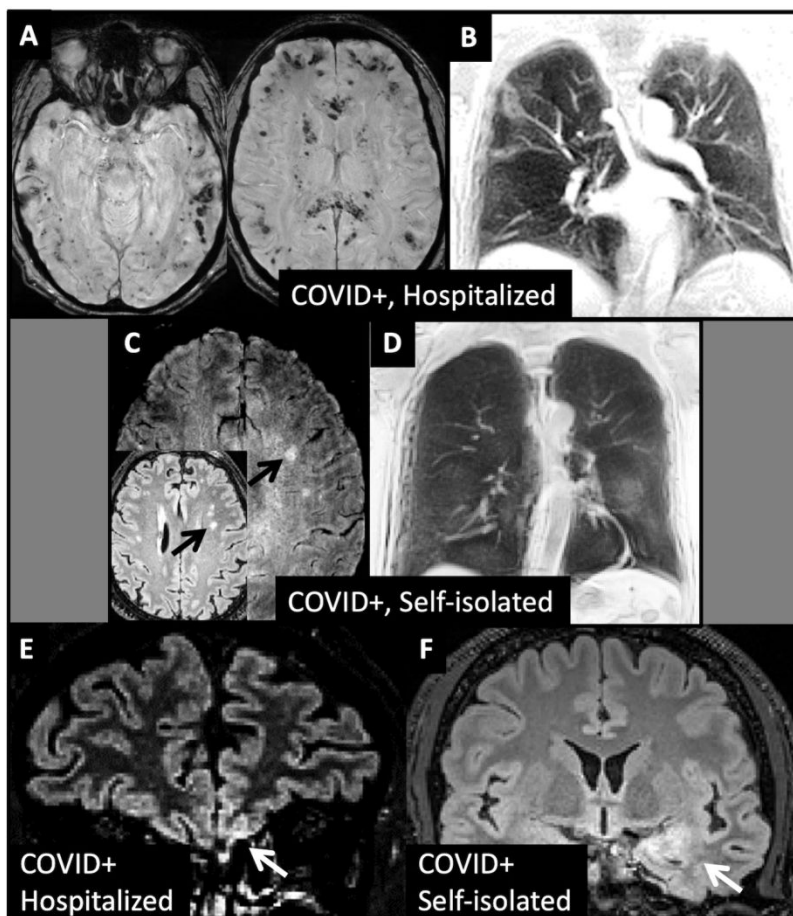

**Figure 1.** Brain and lung images from a selection of study participants. *Top:* a COVID+ male in his 50's who spent >12 days on a ventilator before recovering showed (A) numerous moderate sized lesions on SWI and (B) substantial abnormal signal intensities on lung imaging. This individual had severely impaired olfaction and moderate behavioural impairment (NIH toolbox 17th percentile on working memory, and complete inability to discriminate previously seen items from similar lures). He has been referred to a neurology clinic for follow-up. *Middle:* a COVID+ male in their 50's who self-isolated and showed micro-lesions in (C) SWI and T2 FLAIR imaging (inset), with (D) corresponding lung image with diffuse changes. Olfaction and sensory/behavioural tests were within age norms but self-report indicated difficulty in performing activities of daily living involving memory. *Bottom:* a COVID+ female in their 50's with moderately impaired olfaction and (E) elevated T2-FLAIR signal near the olfactory bulb and orbitofrontal cortex; and a COVID+ male in their 30's with an encephalitis-like lesion in the temporal lobe as observed (F) on T2-FLAIR imaging.

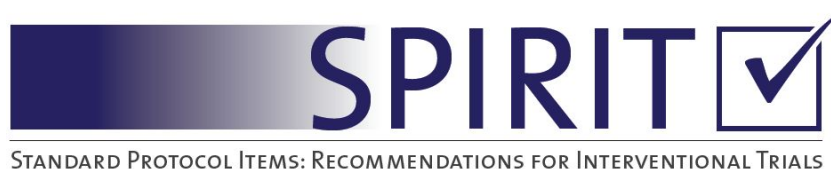

SPIRIT 2013 Checklist: Recommended items to address in a clinical trial protocol and related documents\*

**Herein, the checklist is completed using “GREEN” font with respect to:  
CMAJOpen-2021-0023, entitled "NeuroCOVID-19: a longitudinal protocol for observing impact on brain structure and function in individuals recovering from COVID-19 after hospitalization or self-isolation  
Submitted by MacIntosh et al.**

| Section/item                      | Item No | Description                                                                                                                                                                                                                                                                                                        |
|-----------------------------------|---------|--------------------------------------------------------------------------------------------------------------------------------------------------------------------------------------------------------------------------------------------------------------------------------------------------------------------|
| <b>Administrative information</b> |         |                                                                                                                                                                                                                                                                                                                    |
| Title                             | 1       | Descriptive title identifying the study design, population, interventions, and, if applicable, trial acronym<br><b>COMPLETED</b>                                                                                                                                                                                   |
| Trial registration                | 2a      | Trial identifier and registry name. If not yet registered, name of intended registry<br><b>INTENDING TO REGISTER WITH <a href="https://clinicaltrials.org">clinicaltrials.org</a></b>                                                                                                                              |
|                                   | 2b      | All items from the World Health Organization Trial Registration Data Set<br><b>N.A.</b>                                                                                                                                                                                                                            |
| Protocol version                  | 3       | Date and version identifier: <b>COMPLETED</b>                                                                                                                                                                                                                                                                      |
| Funding                           | 4       | Sources and types of financial, material, and other support:<br><b>COMPLETED</b>                                                                                                                                                                                                                                   |
| Roles and responsibilities        | 5a      | Names, affiliations, and roles of protocol contributors: <b>COMPLETED</b>                                                                                                                                                                                                                                          |
|                                   | 5b      | Name and contact information for the trial sponsor: <b>N.A.</b>                                                                                                                                                                                                                                                    |
|                                   | 5c      | Role of study sponsor and funders, if any, in study design; collection, management, analysis, and interpretation of data; writing of the report; and the decision to submit the report for publication, including whether they will have ultimate authority over any of these activities: <b>N.A.</b>              |
|                                   | 5d      | Composition, roles, and responsibilities of the coordinating centre, steering committee, endpoint adjudication committee, data management team, and other individuals or groups overseeing the trial, if applicable (see Item 21a for data monitoring committee): <b>DATA MANAGEMENT TEAM is currently pending</b> |

1  
2  
3  
4  
5  
6  
7  
8  
9  
10  
11  
12  
13  
14  
15  
16  
17  
18  
19  
20  
21  
22  
23  
24  
25  
26  
27  
28  
29  
30  
31  
32  
33  
34  
35  
36  
37  
38  
39  
40  
41  
42  
43  
44  
45  
46  
47  
48  
49  
50  
51  
52  
53  
54  
55  
56  
57  
58  
59  
60

## Introduction

|                          |    |                                                                                                                                                                                                                             |
|--------------------------|----|-----------------------------------------------------------------------------------------------------------------------------------------------------------------------------------------------------------------------------|
| Background and rationale | 6a | Description of research question and justification for undertaking the trial, including summary of relevant studies (published and unpublished) examining benefits and harms for each intervention: <b>COMPLETED</b>        |
|                          | 6b | Explanation for choice of comparators: <b>COMPLETED</b>                                                                                                                                                                     |
| Objectives               | 7  | Specific objectives or hypotheses: <b>COMPLETED</b>                                                                                                                                                                         |
| Trial design             | 8  | Description of trial design including type of trial (eg, parallel group, crossover, factorial, single group), allocation ratio, and framework (eg, superiority, equivalence, noninferiority, exploratory): <b>COMPLETED</b> |

## Methods: Participants, interventions, and outcomes

|                      |     |                                                                                                                                                                                                                                                                                                                                                                                                  |
|----------------------|-----|--------------------------------------------------------------------------------------------------------------------------------------------------------------------------------------------------------------------------------------------------------------------------------------------------------------------------------------------------------------------------------------------------|
| Study setting        | 9   | Description of study settings (eg, community clinic, academic hospital) and list of countries where data will be collected. Reference to where list of study sites can be obtained: <b>COMPLETED</b>                                                                                                                                                                                             |
| Eligibility criteria | 10  | Inclusion and exclusion criteria for participants. If applicable, eligibility criteria for study centres and individuals who will perform the interventions (eg, surgeons, psychotherapists): <b>COMPLETED</b>                                                                                                                                                                                   |
| Interventions        | 11a | Interventions for each group with sufficient detail to allow replication, including how and when they will be administered: <b>N.A. for this observational study</b>                                                                                                                                                                                                                             |
|                      | 11b | Criteria for discontinuing or modifying allocated interventions for a given trial participant (eg, drug dose change in response to harms, participant request, or improving/worsening disease): <b>N.A.</b>                                                                                                                                                                                      |
|                      | 11c | Strategies to improve adherence to intervention protocols, and any procedures for monitoring adherence (eg, drug tablet return, laboratory tests): <b>N.A.</b>                                                                                                                                                                                                                                   |
|                      | 11d | Relevant concomitant care and interventions that are permitted or prohibited during the trial: <b>N.A.</b>                                                                                                                                                                                                                                                                                       |
| Outcomes             | 12  | Primary, secondary, and other outcomes, including the specific measurement variable (eg, systolic blood pressure), analysis metric (eg, change from baseline, final value, time to event), method of aggregation (eg, median, proportion), and time point for each outcome. Explanation of the clinical relevance of chosen efficacy and harm outcomes is strongly recommended: <b>COMPLETED</b> |
| Participant timeline | 13  | Time schedule of enrolment, interventions (including any run-ins and washouts), assessments, and visits for participants. A schematic diagram is highly recommended (see Figure): <b>COMPLETED</b>                                                                                                                                                                                               |

|   |             |    |                                                                       |
|---|-------------|----|-----------------------------------------------------------------------|
| 1 |             |    |                                                                       |
| 2 | Sample size | 14 | Estimated number of participants needed to achieve study objectives   |
| 3 |             |    | and how it was determined, including clinical and statistical         |
| 4 |             |    | assumptions supporting any sample size calculations: <b>COMPLETED</b> |
| 5 |             |    |                                                                       |
| 6 | Recruitment | 15 | Strategies for achieving adequate participant enrolment to reach      |
| 7 |             |    | target sample size: <b>COMPLETED</b>                                  |
| 8 |             |    |                                                                       |

### Methods: Assignment of interventions (for controlled trials)

#### Allocation:

|    |                |     |                                                                         |
|----|----------------|-----|-------------------------------------------------------------------------|
| 11 |                |     |                                                                         |
| 12 |                |     |                                                                         |
| 13 | Sequence       | 16a | Method of generating the allocation sequence (eg, computer-             |
| 14 | generation     |     | generated random numbers), and list of any factors for stratification.  |
| 15 |                |     | To reduce predictability of a random sequence, details of any planned   |
| 16 |                |     | restriction (eg, blocking) should be provided in a separate document    |
| 17 |                |     | that is unavailable to those who enrol participants or assign           |
| 18 |                |     | interventions: <b>N.A. no randomization</b>                             |
| 19 |                |     |                                                                         |
| 20 |                |     |                                                                         |
| 21 | Allocation     | 16b | Mechanism of implementing the allocation sequence (eg, central          |
| 22 | concealment    |     | telephone; sequentially numbered, opaque, sealed envelopes),            |
| 23 | mechanism      |     | describing any steps to conceal the sequence until interventions are    |
| 24 |                |     | assigned: <b>N.A.</b>                                                   |
| 25 |                |     |                                                                         |
| 26 |                |     |                                                                         |
| 27 | Implementation | 16c | Who will generate the allocation sequence, who will enrol participants, |
| 28 |                |     | and who will assign participants to interventions: <b>N.A.</b>          |
| 29 |                |     |                                                                         |
| 30 | Blinding       | 17a | Who will be blinded after assignment to interventions (eg, trial        |
| 31 | (masking)      |     | participants, care providers, outcome assessors, data analysts), and    |
| 32 |                |     | how: <b>COMPLETED</b>                                                   |
| 33 |                |     |                                                                         |
| 34 |                |     |                                                                         |
| 35 |                | 17b | If blinded, circumstances under which unblinding is permissible, and    |
| 36 |                |     | procedure for revealing a participant's allocated intervention during   |
| 37 |                |     | the trial: <b>COMPLETED</b>                                             |
| 38 |                |     |                                                                         |

### Methods: Data collection, management, and analysis

|    |                 |     |                                                                          |
|----|-----------------|-----|--------------------------------------------------------------------------|
| 39 |                 |     |                                                                          |
| 40 |                 |     |                                                                          |
| 41 | Data collection | 18a | Plans for assessment and collection of outcome, baseline, and other      |
| 42 | methods         |     | trial data, including any related processes to promote data quality (eg, |
| 43 |                 |     | duplicate measurements, training of assessors) and a description of      |
| 44 |                 |     | study instruments (eg, questionnaires, laboratory tests) along with      |
| 45 |                 |     | their reliability and validity, if known. Reference to where data        |
| 46 |                 |     | collection forms can be found, if not in the protocol: <b>COMPLETED</b>  |
| 47 |                 |     |                                                                          |
| 48 |                 |     |                                                                          |
| 49 |                 | 18b | Plans to promote participant retention and complete follow-up,           |
| 50 |                 |     | including list of any outcome data to be collected for participants who  |
| 51 |                 |     | discontinue or deviate from intervention protocols: <b>N.A.</b>          |
| 52 |                 |     |                                                                          |
| 53 |                 |     |                                                                          |
| 54 | Data            | 19  | Plans for data entry, coding, security, and storage, including any       |
| 55 | management      |     | related processes to promote data quality (eg, double data entry;        |
| 56 |                 |     | range checks for data values). Reference to where details of data        |
| 57 |                 |     | management procedures can be found, if not in the protocol:              |
| 58 |                 |     | <b>COMPLETED</b>                                                         |
| 59 |                 |     |                                                                          |
| 60 |                 |     |                                                                          |

- 1  
2  
3  
4  
5  
6  
7  
8  
9  
10  
11  
12  
13
- |                     |     |                                                                                                                                                                                              |
|---------------------|-----|----------------------------------------------------------------------------------------------------------------------------------------------------------------------------------------------|
| Statistical methods | 20a | Statistical methods for analysing primary and secondary outcomes. Reference to where other details of the statistical analysis plan can be found, if not in the protocol: <b>COMPLETED</b>   |
|                     | 20b | Methods for any additional analyses (eg, subgroup and adjusted analyses) <b>COMPLETED</b>                                                                                                    |
|                     | 20c | Definition of analysis population relating to protocol non-adherence (eg, as randomised analysis), and any statistical methods to handle missing data (eg, multiple imputation): <b>N.A.</b> |

#### Methods: Monitoring

- 14  
15  
16  
17  
18  
19  
20  
21  
22  
23  
24  
25  
26  
27  
28  
29  
30  
31  
32  
33  
34  
35  
36  
37  
38  
39
- |                 |     |                                                                                                                                                                                                                                                                                                                                                                                                                                                                                              |
|-----------------|-----|----------------------------------------------------------------------------------------------------------------------------------------------------------------------------------------------------------------------------------------------------------------------------------------------------------------------------------------------------------------------------------------------------------------------------------------------------------------------------------------------|
| Data monitoring | 21a | Composition of data monitoring committee (DMC); summary of its role and reporting structure; statement of whether it is independent from the sponsor and competing interests; and reference to where further details about its charter can be found, if not in the protocol. Alternatively, an explanation of why a DMC is not needed: <b>An ad-hoc data monitoring committee is in place however a formal committee is currently pending due to the nature of this observational study.</b> |
|                 | 21b | Description of any interim analyses and stopping guidelines, including who will have access to these interim results and make the final decision to terminate the trial: <b>N.A.</b>                                                                                                                                                                                                                                                                                                         |
| Harms           | 22  | Plans for collecting, assessing, reporting, and managing solicited and spontaneously reported adverse events and other unintended effects of trial interventions or trial conduct <b>N.A.</b>                                                                                                                                                                                                                                                                                                |
| Auditing        | 23  | Frequency and procedures for auditing trial conduct, if any, and whether the process will be independent from investigators and the sponsor <b>N.A. this study does not involve a medicinal / therapy.</b>                                                                                                                                                                                                                                                                                   |

#### Ethics and dissemination

- 40  
41  
42  
43  
44  
45  
46  
47  
48  
49  
50  
51  
52  
53  
54  
55  
56  
57  
58  
59  
60
- |                          |     |                                                                                                                                                                                                                                                   |
|--------------------------|-----|---------------------------------------------------------------------------------------------------------------------------------------------------------------------------------------------------------------------------------------------------|
| Research ethics approval | 24  | Plans for seeking research ethics committee/institutional review board (REC/IRB) approval: <b>COMPLETED</b>                                                                                                                                       |
| Protocol amendments      | 25  | Plans for communicating important protocol modifications (eg, changes to eligibility criteria, outcomes, analyses) to relevant parties (eg, investigators, REC/IRBs, trial participants, trial registries, journals, regulators) <b>COMPLETED</b> |
| Consent or assent        | 26a | Who will obtain informed consent or assent from potential trial participants or authorised surrogates, and how (see Item 32) <b>COMPLETED</b>                                                                                                     |
|                          | 26b | Additional consent provisions for collection and use of participant data and biological specimens in ancillary studies, if applicable <b>COMPLETED</b>                                                                                            |

|    |                   |     |                                                                              |
|----|-------------------|-----|------------------------------------------------------------------------------|
| 1  |                   |     |                                                                              |
| 2  | Confidentiality   | 27  | How personal information about potential and enrolled participants will      |
| 3  |                   |     | be collected, shared, and maintained in order to protect confidentiality     |
| 4  |                   |     | before, during, and after the trial <b>COMPLETED</b>                         |
| 5  |                   |     |                                                                              |
| 6  | Declaration of    | 28  | Financial and other competing interests for principal investigators for      |
| 7  | interests         |     | the overall trial and each study site <b>COMPLETED</b>                       |
| 8  |                   |     |                                                                              |
| 9  | Access to data    | 29  | Statement of who will have access to the final trial dataset, and            |
| 10 |                   |     | disclosure of contractual agreements that limit such access for              |
| 11 |                   |     | investigators <b>COMPLETED</b>                                               |
| 12 |                   |     |                                                                              |
| 13 | Ancillary and     | 30  | Provisions, if any, for ancillary and post-trial care, and for               |
| 14 | post-trial care   |     | compensation to those who suffer harm from trial participation <b>N.A.</b>   |
| 15 |                   |     |                                                                              |
| 16 | Dissemination     | 31a | Plans for investigators and sponsor to communicate trial results to          |
| 17 | policy            |     | participants, healthcare professionals, the public, and other relevant       |
| 18 |                   |     | groups (eg, via publication, reporting in results databases, or other        |
| 19 |                   |     | data sharing arrangements), including any publication restrictions           |
| 20 |                   |     | <b>COMPLETED</b>                                                             |
| 21 |                   |     |                                                                              |
| 22 |                   | 31b | Authorship eligibility guidelines and any intended use of professional       |
| 23 |                   |     | writers <b>N.A.</b>                                                          |
| 24 |                   |     |                                                                              |
| 25 |                   | 31c | Plans, if any, for granting public access to the full protocol, participant- |
| 26 |                   |     | level dataset, and statistical code <b>COMPLETED</b>                         |
| 27 |                   |     |                                                                              |
| 28 |                   |     |                                                                              |
| 29 |                   |     |                                                                              |
| 30 |                   |     |                                                                              |
| 31 | <b>Appendices</b> |     |                                                                              |
| 32 |                   |     |                                                                              |
| 33 | Informed consent  | 32  | Model consent form and other related documentation given to                  |
| 34 | materials         |     | participants and authorised surrogates <b>COMPLETED</b>                      |
| 35 |                   |     |                                                                              |
| 36 | Biological        | 33  | Plans for collection, laboratory evaluation, and storage of biological       |
| 37 | specimens         |     | specimens for genetic or molecular analysis in the current trial and for     |
| 38 |                   |     | future use in ancillary studies, if applicable <b>COMPLETED</b>              |
| 39 |                   |     |                                                                              |

---

\*It is strongly recommended that this checklist be read in conjunction with the SPIRIT 2013 Explanation & Elaboration for important clarification on the items. Amendments to the protocol should be tracked and dated. The SPIRIT checklist is copyrighted by the SPIRIT Group under the Creative Commons "[Attribution-NonCommercial-NoDerivs 3.0 Unported](#)" license.
